# Supplementary material for: Synthesis of homogeneous silver nanosheet assemblies for surface enhanced Raman scattering applications
Source: Royal Society of Chemistry journal article supplement (doi:10.1039/c0jm01322f), 2010-01-01
Supplement: c0jm01322f.pdf [file c0jm01322f.pdf]

## Supporting Information

### Synthesis of homogeneous silver nanosheet assemblies for surface enhanced Raman scattering applications

Ping Xu,<sup>\*a,b</sup> Bin Zhang,<sup>a</sup> Nathan H. Mack,<sup>b</sup> Stephen K. Doorn,<sup>b</sup> Xijiang Han<sup>\*a</sup> and Hsing-Lin Wang<sup>\*b</sup>

<sup>a</sup> Department of Chemistry, Harbin Institute of Technology, Harbin 150001, China. Fax: 86 451 86418750; Tel: 86 451 86413702; E-mail: [pxu@hit.edu.cn](mailto:pxu@hit.edu.cn)

<sup>b</sup> Physical Chemistry and Spectroscopy, Chemistry Division, Los Alamos National Laboratory, Los Alamos, NM 87545, USA. Tel: 1 505 6679944; E-mail: [hwang@lanl.gov](mailto:hwang@lanl.gov)

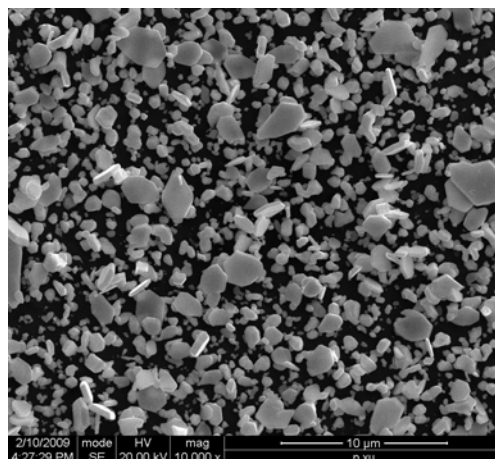

**Fig. S1** SEM image of the Ag structures fabricated by immersing the PANI membrane in 15 mM AgNO<sub>3</sub> aqueous solution for 30 min.

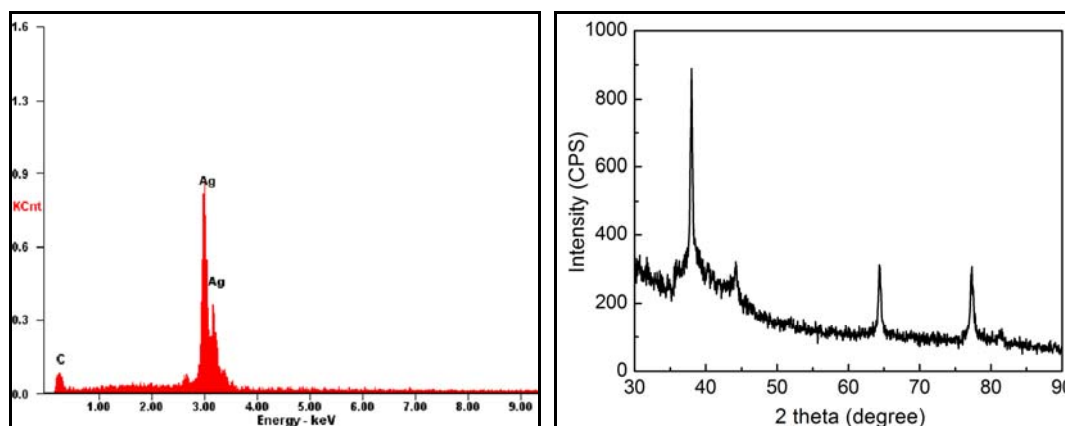

**Fig. S2** (left) Energy-dispersive X-ray spectrum (EDAX) and (right) X-ray diffraction (XRD) pattern of the structures fabricated on the PANI membranes.

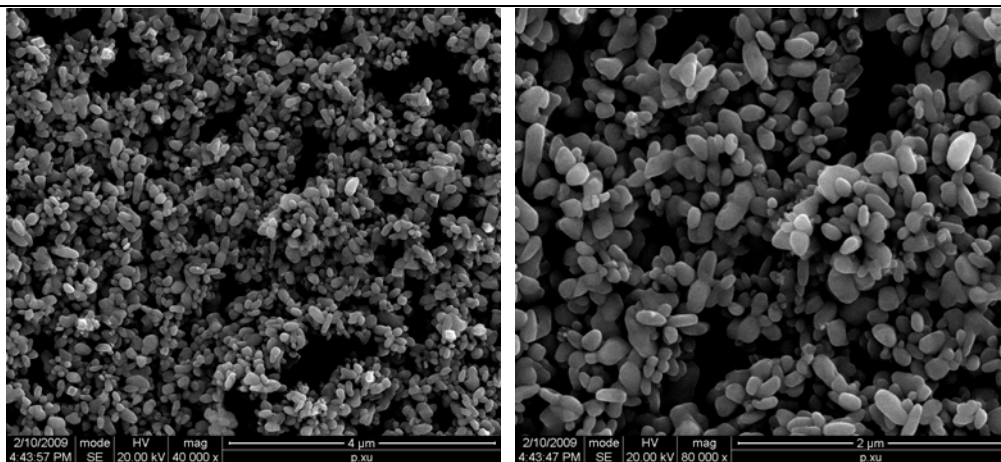

**Fig. S3** SEM images of Ag structures produced by immersing the P-G membrane (doped by citric acid) in 50 mM AgNO<sub>3</sub> for 30 min, then in 0.1 M HNO<sub>3</sub> for 1 h.
